# Instructions for Obtaining ANESTHESIOLOGY Continuing Medical Education (CME) Credit

CME Editors: Leslie C. Jameson, M.D., Richard P. Dutton, M.D., M.B.A., and Dan J. Kopacz, M.D.

ANESTHESIOLOGY's Journal CME is open to all readers. Members of the American Society of Anesthesiologists (ASA) enjoy a preferred rate for their subscription. However, Journal CME is not limited to ASA members or Journal subscribers. To take part in Journal CME, complete the following steps:

1. For the article listed on the right, read the learning objectives and disclosure information.
2. Read the article in the print or online edition.
3. Register at [www.asahq.org/journal-cme](http://www.asahq.org/journal-cme) and provide payment.
4. Once online, complete the questions and other required information for the CME program, including the evaluation.

The American Society of Anesthesiologists is accredited by the Accreditation Council for Continuing Medical Education to provide continuing medical education for physicians.

The American Society of Anesthesiologists designates this educational activity for a maximum of 1 *AMA PRA Category 1 Credit(s)*<sup>TM</sup>. Physicians should only claim credit commensurate with the extent of their participation in the activity.

**Purpose:** The focus of ANESTHESIOLOGY Journal CME is to educate readers on current developments in the science and clinical practice of anesthesiology.

**Target Audience:** ANESTHESIOLOGY Journal CME is designed for physicians involved with anesthesiology education, clinical practice, and research.

## Journal CME Planning Participants Disclosures

**Editor-in-Chief:** James C. Eisenach, M.D., has no relevant financial relationships to disclose.

**CME Editors:** Leslie C. Jameson, M.D., Richard P. Dutton, M.D., M.B.A., and Dan J. Kopacz, M.D., have no relevant financial relationships to disclose.

**ASA Staff:** Employees involved in planning have no relevant financial relationships to disclose.

## Claiming Credit

All tests and requests for credit must be submitted through the ANESTHESIOLOGY CME website at [www.asahq.org/journal-cme](http://www.asahq.org/journal-cme). Participants should claim credit in 15-minute increments, for a maximum of 1 *AMA PRA Category 1 Credit(s)*<sup>TM</sup> per journal article.

Two payment options are available:

|            | ASA Member | Non-member |
|------------|------------|------------|
| Annual Fee | \$60       | \$120      |
| Per Issue  | \$10       | \$20       |

Payment may be made using Visa or MasterCard.

Please direct any questions about Journal CME to:

Joyce Canselor  
Education Coordinator, CME  
(847) 268-9185  
[j.canselor@asahq.org](mailto:j.canselor@asahq.org)

## This Month's ANESTHESIOLOGY Journal CME

Read the article by Spahn entitled "Anemia and patient blood management in hip and knee surgery: A systematic review of the literature" on page 482 of this issue.

## Learning Objective(s)

After completing this activity, the learner should understand the prevalence of anemia in patients undergoing major hip and knee surgery, the known correlations between preoperative anemia and outcome, and the known impact of transfusion on patients undergoing major orthopedic surgery.

## Author(s) Disclosures

**Author:** Donat R. Spahn, M.D., F.R.C.A., has disclosed receiving an unrestricted research grant for the study from Vifor Pharma AG. Dr. Spahn's academic department is currently receiving grant support from Abbott AG, B. Braun, CSL Behring, Vifor SA, UBS, and Stiftung für Staublungenforschung. Dr. Spahn is the chairman of the ABC Faculty and a member of the ABC Trauma Faculty, both of which are managed by Thomson Physicians World GmbH, and sponsored by an unrestricted educational grant from Novo Nordisk A/S. In the past 5 years, Dr. Spahn has received honoraria or travel support for consulting or lecturing from the following companies: Abbott AG, Alliance Pharmaceutical Corp., AstraZeneca AG, Bayer (Schweiz) AG, B. Braun Melsungen AG, Boehringer Ingelheim (Schweiz) GmbH, CSL Behring GmbH, Curacys AG, Fresenius SE, Galencia AG (including Vifor SA), GlaxoSmithKline GmbH & Co. KG, Janssen-Cilag AG, Novo Nordisk A/S, Octapharma AG, Organon AG, Oxygen Biotherapeutics, Pentapharm GmbH, Roche Pharma (Schweiz) AG, and Schering-Plough International, Inc.

## Expiration

Registration and submission of answers must be completed by August 31, 2013.
